# Supplementary material for: Synergism between B–N atomic pair for promoting the catalytic cracking of 1,2-dichloroethane
Source: Royal Society of Chemistry journal article supplement (doi:10.1039/d4cy00774c), 2024-01-01
Supplement: d4cy00774c1.pdf [file d4cy00774c1.pdf]

## Supporting Information

### **Synergism between B-N atomic pair for promoting the catalytic cracking of 1,2-dichloroethane**

*Yaqi Yao*<sup>a,b</sup>, *Hongying Zhuo*<sup>a\*</sup>, *Fanan Wang*<sup>c</sup>, *Guiyue Bi*<sup>a,d</sup>, *Jinming Xu*<sup>a\*</sup>, *Xiaofeng Yang*<sup>a</sup>, *Yanqiang Huang*<sup>a</sup>

<sup>a</sup> State Key Laboratory of Catalysis, Dalian Institute of Chemical Physics, Chinese Academy of Sciences, Dalian 116023, China.

<sup>b</sup> University of Chinese Academy of Sciences, Beijing 100049, China.

<sup>c</sup> Institute of Biology and Chemistry, Fujian University of Technology, Fuzhou 350118, China.

<sup>d</sup> Department of Chemical Physics, University of Science and Technology of China, Hefei 230026, China.

\*Corresponding authors.

E-mail: [zhuohongying@dicp.ac.cn](mailto:zhuohongying@dicp.ac.cn) (Hongying Zhuo); [xujm@dicp.ac.cn](mailto:xujm@dicp.ac.cn) (Jinming Xu)

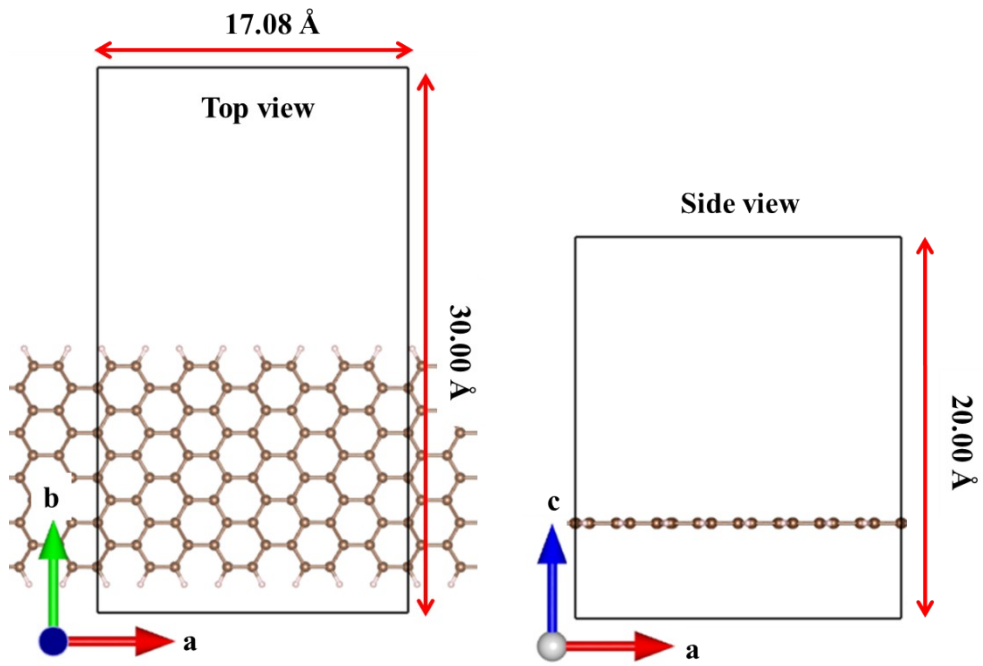

Figure S1 Structure of the hydrogen-terminated graphene nanoribbon with armchair edge.

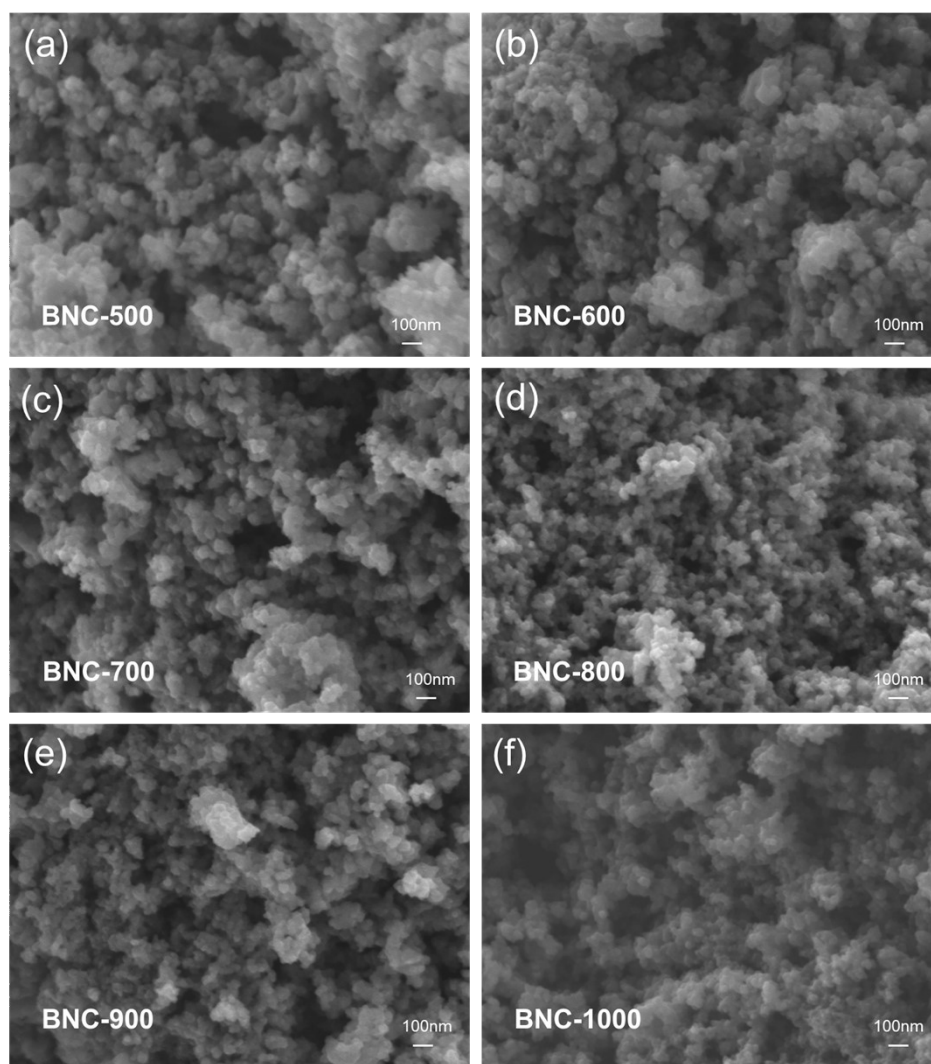

Figure S2 SEM images of (a) BNC-500, (b) BNC-600, (c) BNC-700, (d) BNC-800, (e) BNC-900, (f) BNC-1000.

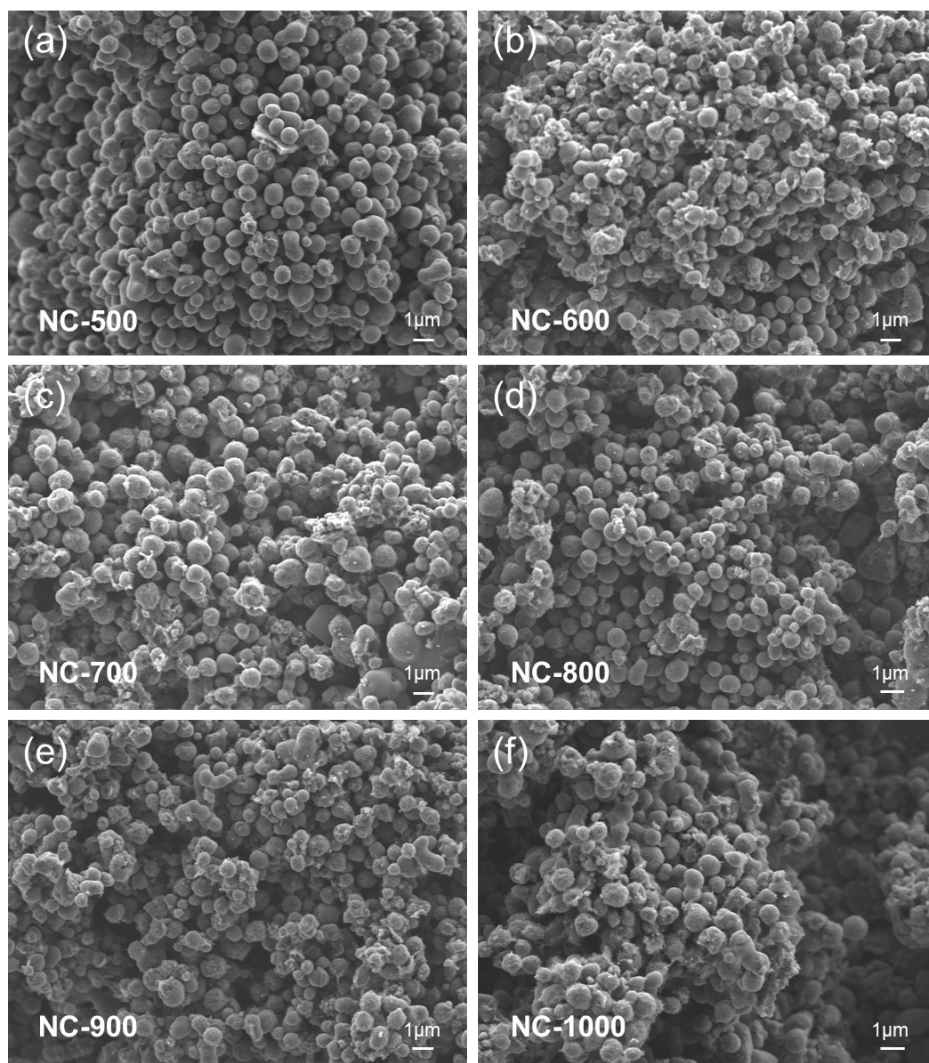

Figure S3 SEM images of (a) NC-500, (b) NC-600, (c) NC-700, (d) NC-800, (e) NC-900, (f) NC-1000.

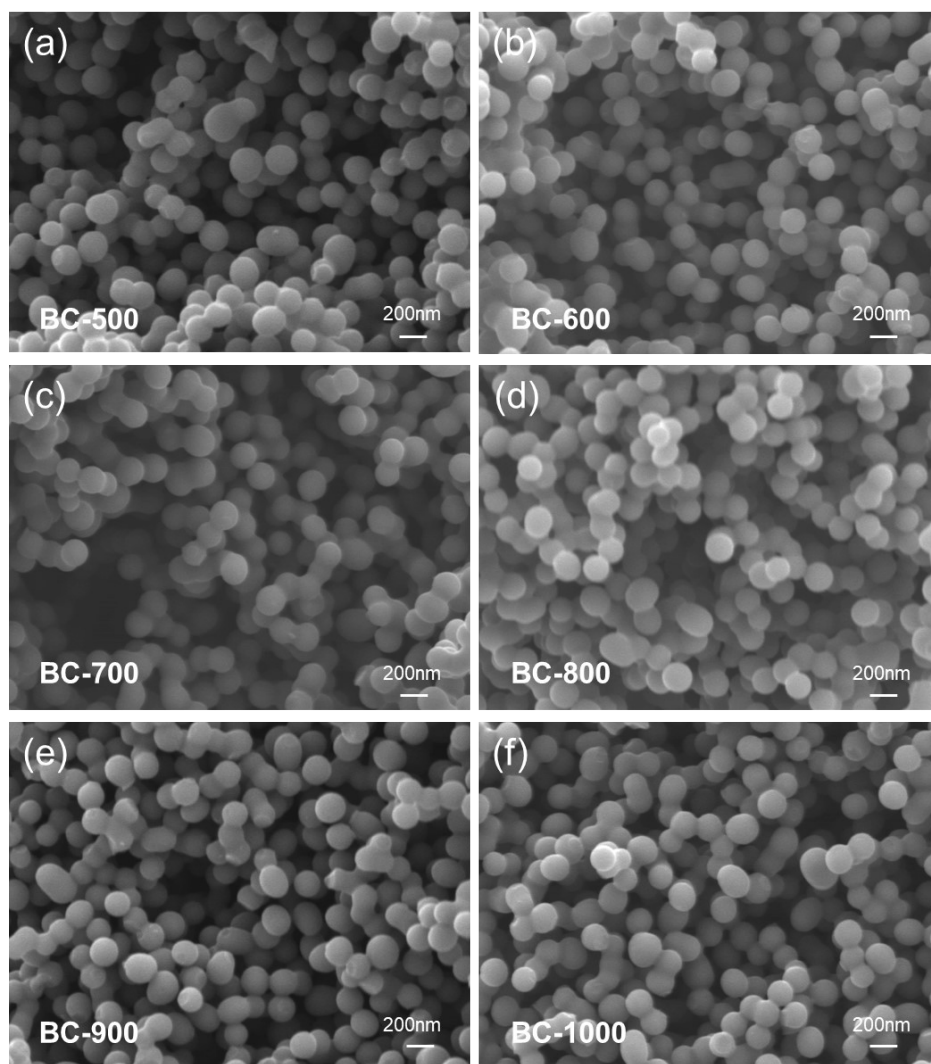

Figure S4 SEM images of (a) BC-500, (b) BC-600, (c) BC-700, (d) BC-800, (e) BC-900, (f) BC-1000.

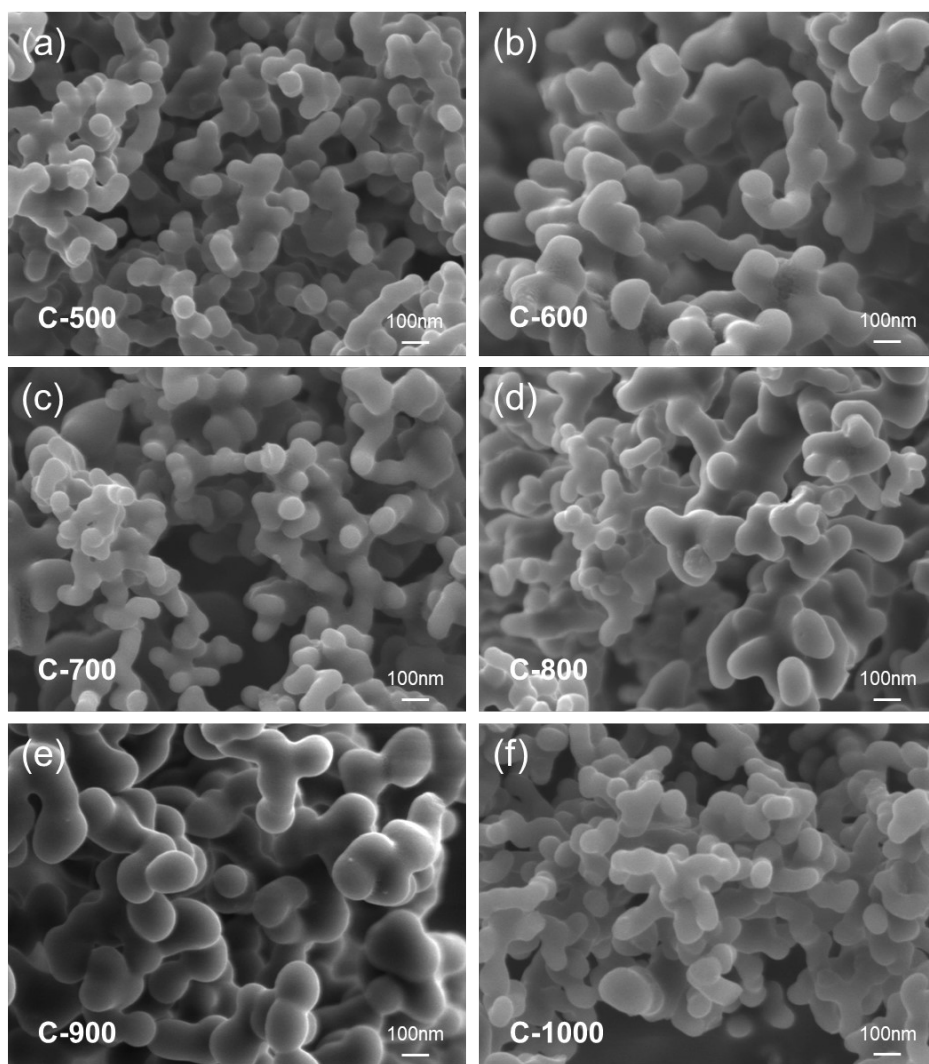

Figure S5 SEM images of (a) C-500, (b) C-600, (c) C-700, (d) C-800, (e) C-900, (f) C-1000.

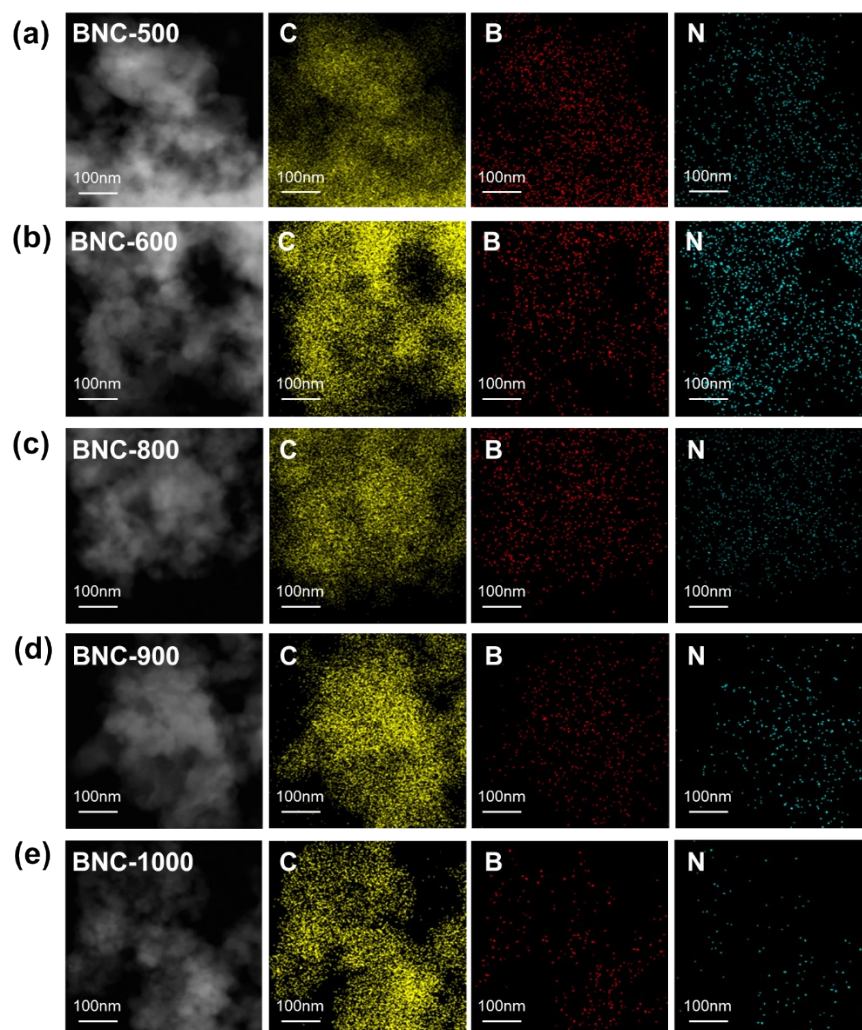

Figure S6 TEM images and elemental distribution mapping of C, B, N in (a) BNC-500, (b) BNC-600, (c) BNC-800, (d) BNC-900 and (e) BNC-1000.

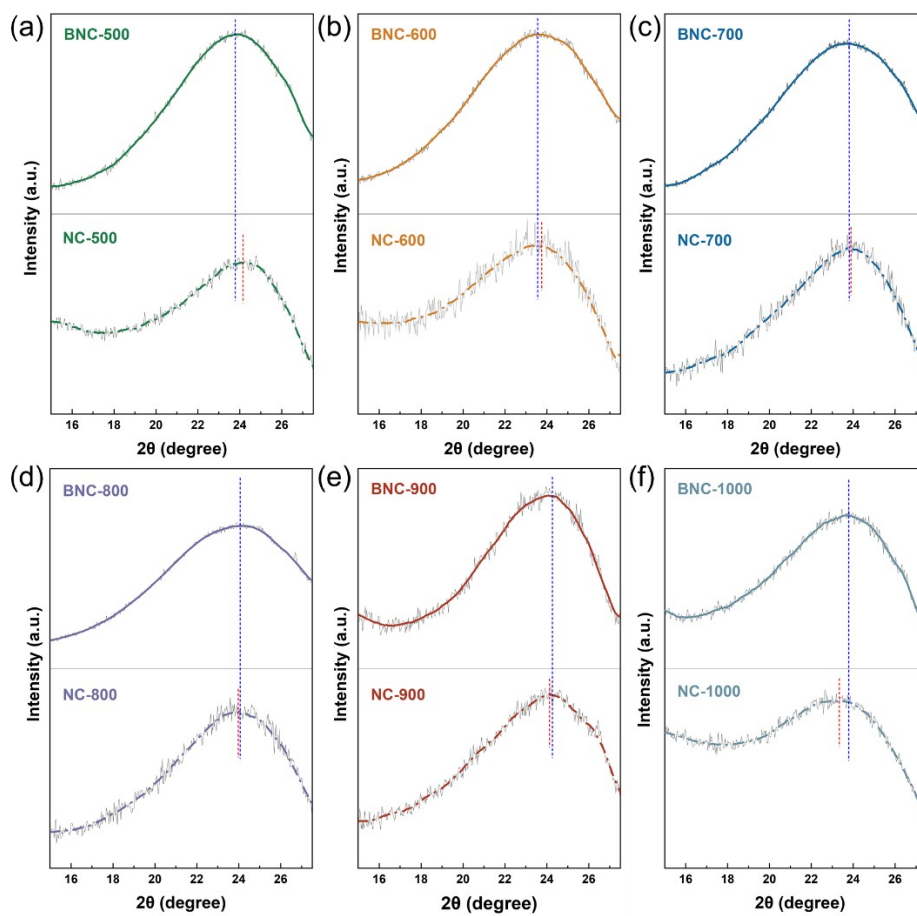

Figure S7 XRD patterns and peak shift of (a) BNC-500, (b) BNC-600, (c) BNC-700, (d) BNC-800, (e) BNC-900 and (f) BNC-1000.



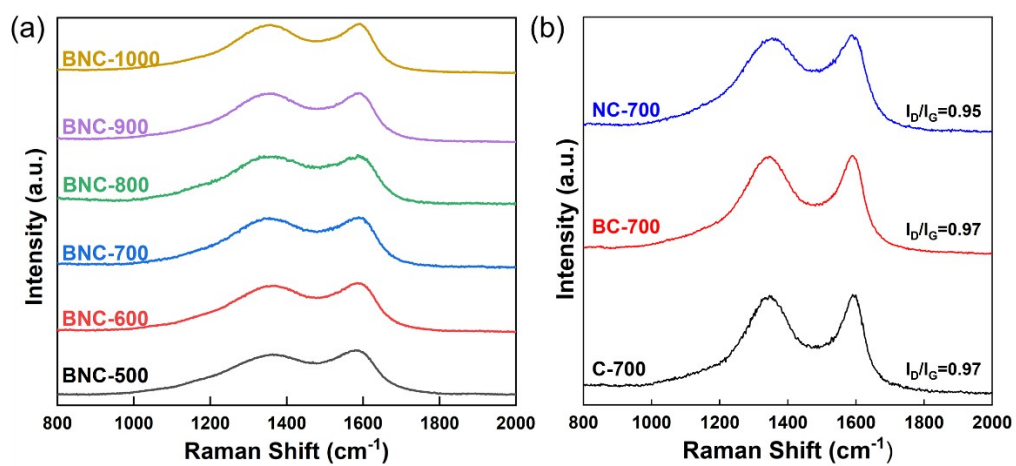

Figure S8 Raman spectra of (a) BNC with different calcination temperature and (b) NC, BC, C calcinated at 700 °C

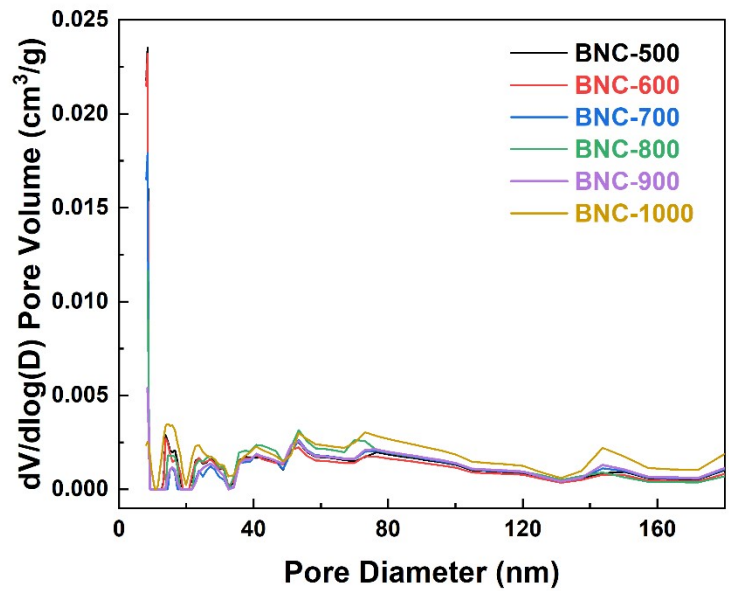

Figure S9 Pore size distribution of BNC

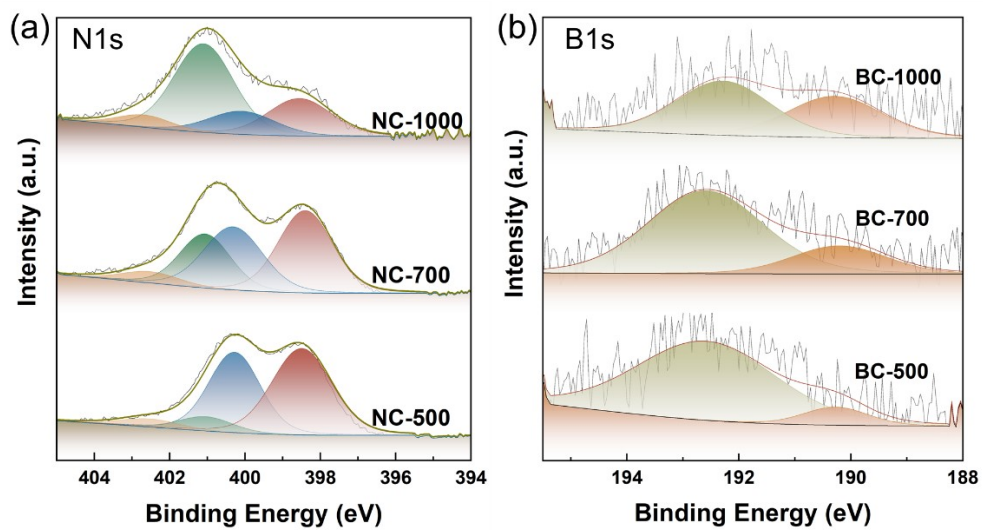

Figure S10 (a) XPS of N1s of NC; (b) XPS of B1s of BC.

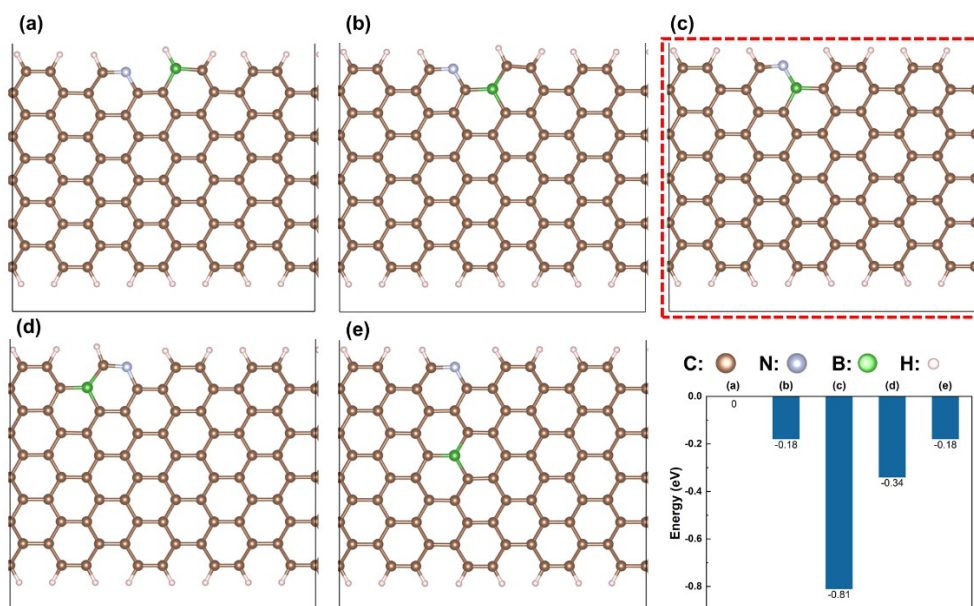

Figure S11 Different doping sites of B and their energy difference corresponding to a.

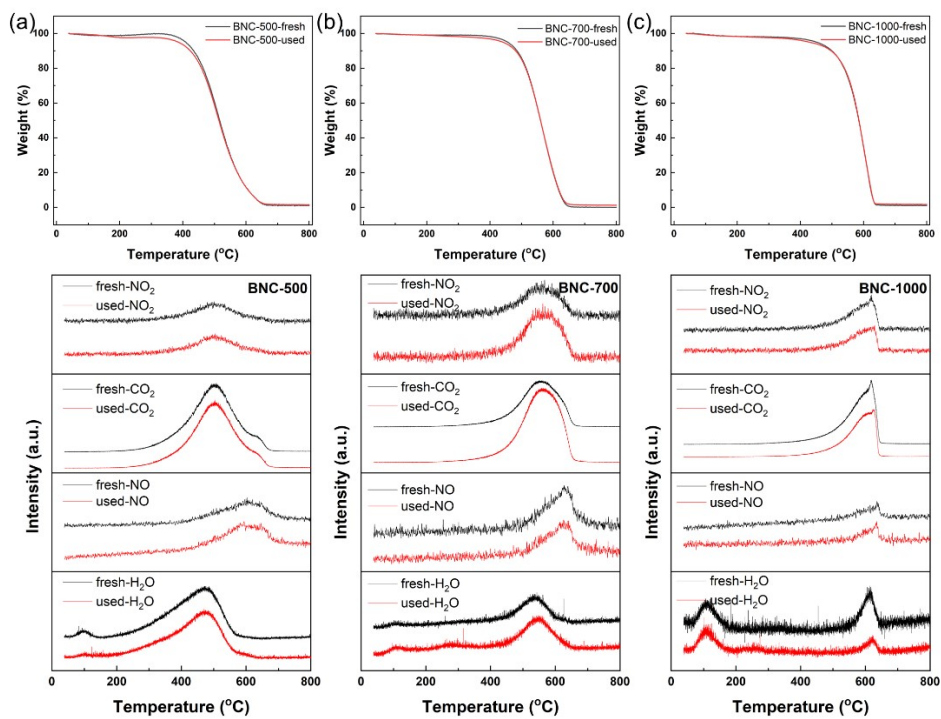

Figure S12 Thermogravimetric analysis curves recorded in air atmosphere and the removal of C, O and N in (a) BNC-500, (b) BNC-700 and (c) BNC-1000 catalysts before and after reaction

Table S1 The effect of the testing parameters on the energy.

| ENCUT (eV) | $E_{\text{gas+cat}}$ (eV) | $E_{\text{Cat}}$ (eV) | $E_{\text{gas+cat}}$ (eV) | $DE$ (eV)   |
|------------|---------------------------|-----------------------|---------------------------|-------------|
| 350        | -832.4023028              | -794.5408574          | -37.70712987              | -0.15431551 |
| 400        | -831.5463520              | -793.6631224          | -37.70712987              | -0.17609973 |
| 450        | -831.1237741              | -793.2398526          | -37.70712987              | -0.17679165 |
| 500        | -831.0193745              | -793.1388791          | -37.70712987              | -0.17336549 |

Table S2 The convergence test data of the vacuum layer

| Vacuum layer ( $\text{\AA}$ ) | $E_{\text{gas+cat}}$ (eV) |
|-------------------------------|---------------------------|
| 15                            | -831.55424365             |
| 20                            | -831.54635200             |
| 25                            | -831.54279351             |

Table S3 The K-Point convergence test data

| KPOINT | $E_{\text{gas+cat}}$ (eV) |
|--------|---------------------------|
| 1X1X1  | -831.18945286             |
| 2X1X1  | -831.54635200             |
| 3X3X3  | -831.54279351             |



Table S4 Physical structure of C catalyst.

| Sample | $S_{\text{BET}}$ (m <sup>2</sup> /g) | $V_{\text{pore}}$ (cm <sup>3</sup> /g) | $V_{\text{meso}}$ (cm <sup>3</sup> /g) |
|--------|--------------------------------------|----------------------------------------|----------------------------------------|
| C-500  | 307                                  | 0.17                                   | 0.046                                  |
| C-600  | 308                                  | 0.19                                   | 0.035                                  |
| C-700  | 325                                  | 0.21                                   | 0.042                                  |
| C-800  | 314                                  | 0.18                                   | 0.015                                  |
| C-900  | 217                                  | 0.14                                   | 0.059                                  |
| C-1000 | 17                                   | 0.023                                  | 0.022                                  |

Table S5 Physical structure of BC catalyst.

| Sample  | $S_{\text{BET}}$ (m <sup>2</sup> /g) | $V_{\text{pore}}$ (cm <sup>3</sup> /g) | $V_{\text{meso}}$ (cm <sup>3</sup> /g) |
|---------|--------------------------------------|----------------------------------------|----------------------------------------|
| BC-500  | 346                                  | 0.22                                   | 0.033                                  |
| BC-600  | 336                                  | 0.20                                   | 0.021                                  |
| BC-700  | 352                                  | 0.22                                   | 0.029                                  |
| BC-800  | 381                                  | 0.24                                   | 0.027                                  |
| BC-900  | 246                                  | 0.16                                   | 0.058                                  |
| BC-1000 | 286                                  | 0.14                                   | 0.17                                   |

Table S6 Physical structure of NC catalyst.

| Sample  | $S_{\text{BET}}$ (m <sup>2</sup> /g) | $V_{\text{pore}}$ (cm <sup>3</sup> /g) | $V_{\text{meso}}$ (cm <sup>3</sup> /g) |
|---------|--------------------------------------|----------------------------------------|----------------------------------------|
| NC-500  | 103                                  | 0.15                                   | 0.11                                   |
| NC-600  | 120                                  | 0.16                                   | 0.13                                   |
| NC-700  | 111                                  | 0.14                                   | 0.10                                   |
| NC-800  | 127                                  | 0.17                                   | 0.12                                   |
| NC-900  | 118                                  | 0.21                                   | 0.17                                   |
| NC-1000 | 115                                  | 0.20                                   | 0.15                                   |

Table S7 EDC conversion of NC, BC, C catalyst with different calcination temperature.

| Sample | T (°C) |       |       |       |       |       |
|--------|--------|-------|-------|-------|-------|-------|
|        | 500    | 600   | 700   | 800   | 900   | 1000  |
| NC     | 16.3   | 14.4  | 10.2  | 8.37  | 6.69  | 5.05  |
| BC     | 0.225  | 0.369 | 0.336 | 0.277 | 0.231 | 0.233 |
| C      | 0.327  | 0.388 | 0.420 | 0.368 | 0.330 | 0.185 |

Table S8 The content of different N species in BNC catalyst before and after reaction.

| Sample        | Pyridinic N | Pyrrolic N | Graphitic N | Oxide N | B-N   |
|---------------|-------------|------------|-------------|---------|-------|
| BNC-500       | 35.15       | 43.66      | 7.75        | 7.35    | 6.09  |
| BNC-500-used  | 29.46       | 41.28      | 18.15       | 6.51    | 4.60  |
| BNC-700       | 25.65       | 28.14      | 23.06       | 7.80    | 15.36 |
| BNC-700-used  | 22.72       | 30.21      | 37.27       | 4.82    | 4.99  |
| BNC-1000      | 14.02       | 12.52      | 53.33       | 9.06    | 11.08 |
| BNC-1000-used | 8.59        | 16.15      | 63.44       | 6.26    | 5.56  |

Table S9 The content of different N species in NC catalyst

| Sample  | Pyridinic N | Pyrrolic N | Graphitic N | Oxide N |
|---------|-------------|------------|-------------|---------|
| NC-500  | 48.92       | 39.17      | 7.28        | 4.63    |
| NC-700  | 38.63       | 31.97      | 23.69       | 5.71    |
| NC-1000 | 24.08       | 15.68      | 53.47       | 6.77    |

Table S10 Physical structure of BNC catalyst after reaction.

| Sample        | $S_{\text{BET}}$ (m <sup>2</sup> /g) | $V_{\text{pore}}$ (cm <sup>3</sup> /g) | $V_{\text{meso}}$ (cm <sup>3</sup> /g) |
|---------------|--------------------------------------|----------------------------------------|----------------------------------------|
| BNC-500-used  | 83                                   | 0.30                                   | 0.28                                   |
| BNC-600-used  | 85                                   | 0.31                                   | 0.29                                   |
| BNC-700-used  | 80                                   | 0.46                                   | 0.45                                   |
| BNC-800-used  | 69                                   | 0.38                                   | 0.38                                   |
| BNC-900-used  | 74                                   | 0.35                                   | 0.34                                   |
| BNC-1000-used | 73                                   | 0.36                                   | 0.35                                   |
